# Supplementary material
Source: publisher site journal article supplement (https://www.dovepress.com/article/585874)
Supplement: Supplementary file 1 [file 585874%20Revised%20%20Supplemntary%20Files.docx]

**Supplementary File 1: Deviation from protocol**

| 1 | In the published protocol, NVivo was initially selected for coding conceptual findings from included studies, but it was found to disrupt the narrative flow and contextual integrity of the data. Coding in isolation distanced the analysis from the lived experiences under investigation. As a result, manual methods were adopted, involving deep reading, cross-study comparison, and organic theme development. Regular research team meetings supported this interpretive process, often using visual aids such as post it notes and matrices to facilitate discussion and synthesis. |
| --- | --- |
| 2 | In the published protocol, we described that we would conduct a meta-ethnography following Sattar (2021)1 however, we did not adhere to this guidance. We followed the original method as described by Noblit and Hare (1988)2 guided by worked examples. |

**Supplementary References**

1. Sattar R, Lawton R, Panagioti M, Johnson J. Meta-ethnography in healthcare research: a guide to using a meta-ethnographic approach for literature synthesis. BMC Health Services Research. 2021;21:50-13

2. Noblit GW, Hare RD. Meta-Ethnography. Vol 11. 1st ed. Los Angeles: SAGE Publications Inc; 1988.

**Supplementary File 2: eMERGe (Improving reporting of Meta-Ethnography) reporting guidance checklist**

| No. | Criteria Headings | Reporting Criteria | Location of where item is reported |
| --- | --- | --- | --- |
| Phase 1: Selecting meta-ethnography and getting started | | |  |
| *Introduction* | | |  |
| 1 | Rationale and context for the meta-ethnography | Describe the gap in research or knowledge to be filled by the meta-ethnography, and the wider context of the meta-ethnography | Page 2-4 |
| 2 | Aim(s) of the meta-ethnography | Describe the meta-ethnography aim(s) | Page 2 |
| 3 | Focus of the meta-ethnography | Describe the meta-ethnography review question(s) (or objectives) | Page 2 |
| 4 | Rationale for using meta-ethnography | Explain why meta-ethnography was considered the most appropriate qualitative synthesis methodology | Page 2 |
| Phase 2: Deciding what is relevant | | |  |
| *Methods* | | |  |
| 5 | Search strategy | Describe the rationale for the literature search strategy | Page 3 |
| 6 | Search processes | Describe how the literature searching was carried out and by whom | Page 3-4 |
| 7 | Selecting primary studies | Describe the process of study screening and selection, and who was involved | Page 3-4 |
| *Findings* | | |  |
| 8 | Outcome of study selection | Describe the results of study searches and screening | Page 5  Figure 1 |
| Phase 3: Reading included studies | | |  |
| *Methods* | | |  |
| 9 | Reading and data extraction approach | Describe the reading and data extraction method and processes | Page 4-5 |
| *Findings* | | |  |
| 10 | Presenting characteristics of included studies | Describe characteristics of the included studies | Page 5-7  Table 3 and 4 |
| Phase 4: Determining how studies are related | | |  |
| *Methods* | | |  |
| 11 | Process for determining how studies are related | Describe the methods and processes for determining how the included studies are related:  - Which aspects of studies were compared  AND  - How the studies were compared | Page 4-5 |
| *Findings* | | |  |
| 12 | Outcome of relating studies | Describe how studies relate to each other | Page 5 |
| Phase 5: Translating studies into one another | | |  |
| *Methods* | | |  |
| 13 | Process of translating studies | Describe the methods of translation**:**  - Describe steps taken to preserve the context and meaning of the relationships between concepts within and across studies- Describe how the reciprocal and refutational translations were conducted- Describe how potential alternative interpretations or explanations were considered in the translations | Page 4 |
| *Findings* | | |  |
| 14 | Outcome of translation | Describe the interpretive findings of the  translation. | Page 5-11 |
| Phase 6: Synthesising translations | | |  |
| *Methods* | | |  |
| 15 | Synthesis process | Describe the methods used to develop overarching concepts (“synthesised translations”). Describe how potential alternative interpretations or explanations were considered in the synthesis | Page 5-12 |
| *Findings* | | |  |
| 16 | Outcome of synthesis process | Describe the new theory, conceptual framework, model, configuration, or interpretation of data developed from the synthesis | Page 11 |
| Phase 7: Expressing the synthesis | | |  |
| *Discussion* | | |  |
| 17 | Summary of findings | Summarize the main interpretive findings of the translation and synthesis and compare them to existing literature | Page 12-13 |
| 18 | Strengths, limitations, and reflexivity | Reflect on and describe the strengths and limitations of the synthesis:  - Methodological aspects—for example, describe how the synthesis findings were influenced by the nature of the included studies and how the meta-ethnography was conducted.- Reflexivity—for example, the impact of the research team on the synthesis findings | Page 13-14 |
| 19 | Recommendations and conclusions | Describe the implications of the synthesis | Page 14 |

France EF, Cunningham M, Ring N, et al. Improving reporting of meta-ethnography: the eMERGe reporting guidance. *BMC Med Res Methodol*. 2019;19(1):25. doi:10.1186/s12874-018-0600-0

**Supplementary File 3: Database Search Strategies**

**Search PubMed via Medline**

| 1 | "General Practice"[MeSH Terms] OR "General Practitioners"[MeSH Terms] OR "decision making, shared"[MeSH Terms] |
| --- | --- |
| 2 | "General Practice"[Title/Abstract] OR "primary health care"[Title/Abstract] OR "general practitioner*"[Title/Abstract] OR "general physician"[Title/Abstract] OR "family physician*"[Title/Abstract] OR "family medicine"[Title/Abstract] OR "family practice"[Title/Abstract] OR "primary care physician*"[Title/Abstract] OR "shared decision-making" OR "shared decision making" OR "shared decision"[All Fields] OR "shared decisions"[All Fields] OR "shared medical decision"[All Fields] OR "shared medical decisions"[All Fields] OR "shared treatment*"[All Fields] OR "shared clinical decision"[All Fields] OR "shared clinical decisions"[All Fields] OR "informed decision"[All Fields] OR "informed choice"[All Fields] OR "decision making"[All Fields] OR "decision support"[All Fields] OR "decision behavior"[All Fields] OR "choice behavior"[All Fields] OR "choice behaviour"[All Fields] OR "decision behaviour"[All Fields] OR "patient participation"[All Fields] OR "patient involvement"[All Fields] OR "participatory decision*"[All Fields] OR "collaborative decision*"[All Fields] |
| 3 | 1 OR 2 |
| 4 | "Perimenopause"[MeSH Terms] OR "Menopause"[MeSH Terms] OR "Premenopause"[MeSH Terms] OR "Estrogen Replacement Therapy"[MeSH Terms] OR "Hormone Replacement Therapy"[MeSH Terms] |
| 5 | "peri-menopause"[All Fields] OR "peri-menopause"[All Fields] OR "perimenopause"[All Fields] OR "perimenopausal symptoms"[All Fields] OR "perimenopausal complaint*"[All Fields] OR "perimenopause*"[All Fields] OR "menopause"[All Fields] OR "climacteric"[All Fields] OR "menopause transition"[All Fields] OR "menopausal transition"[All Fields] OR "HRT"[All Fields] OR "hormonal replacement"[All Fields] OR "menopause hormone therapy"[All Fields] OR "menopause transition"[All Fields] OR "menopausal transition"[All Fields] |
| 6 | "hormone replacement therapy decision"[Title/Abstract:~20] OR "menopause hormone replacement therapy decision"[Title/Abstract:~20] OR "symptoms perimenopause"[Title/Abstract:~20] OR "perimenopausal symptoms"[Title/Abstract:~20] OR "perimenopausal women"[Title/Abstract:~20] OR “perimenopause women” [Title/Abstract:~20] |
| 7 | 4 OR 5 OR 6 |
| 8 | 3 AND 7 |
| 9 | "Qualitative Research"[MeSH Terms] |
| 10 | "qualitative research"[All Fields] OR "mixed-methods"[All Fields] OR "mixed-methods"[All Fields] OR "questionnaire*"[All Fields] OR "focus group*"[All Fields] OR "focus group interview*"[All Fields] OR "focus group discussion*"[All Fields] OR "discourse analysis"[All Fields] OR "content analysis"[All Fields] OR "purposive sampling"[All Fields] OR "phenomenolog*"[All Fields] OR "ethnograph*"[All Fields] OR "grounded theory"[All Fields] OR "hermeneutics"[All Fields] OR "heuristic*"[All Fields] OR "narrative analysis"[All Fields] OR "thematic analysis"[All Fields] OR "themes"[All Fields] OR "thematic"[All Fields] OR "life-world"[All Fields] OR "life-world"[All Fields] OR "live experience"[All Fields] OR "case stud*"[All Fields] OR "case series"[All Fields] OR "case report*" |
| 11 | 9 OR 10 |
| 12 | 8 AND 11 |

Footnotes: truncation symbol is an asterisk *

**Search CINAHL**

| 1 | MH "Family Practice") OR (MH "Physicians, Family") |
| --- | --- |
| 2 | (MH "Hormone Replacement Therapy+") |
| 3 | (MH "Decision Making, Shared") OR (MH "Decision Making, Patient+") OR (MH "Decision Making, Clinical+") OR (MH "Decision Making+") |
| 4 | TI ((“general Practice" OR "primary health care" OR "general practitioner*” OR "general physician” OR "family physicians" OR "family medicine" OR "family practice" OR "primary care physician*" |
| 5 | AB (“General Practice" OR "primary health care" OR "general practitioner*” OR "general physician” OR "family physicians" OR "family medicine" OR "family practice" OR "primary care physician*" |
| 6 | TX ("shared decision" OR "shared decisions" OR "shared medical decision" OR "shared medical decisions" OR "shared treatment*" OR "shared clinical decision" OR "shared clinical decisions" OR "informed decision" OR "informed choice" OR "decision making" OR "decision support" OR "decision behavior" OR "choice behavior" OR “choice behaviour” OR “decision behaviour” OR "patient participation" OR "patient involvement" OR "participatory decision*" OR "collaborative decision*") |
| 7 | 1 OR 2 OR 3 OR 4 OR 5 OR 6 |
| 8 | (MH "Menopause+") OR (MH "Perimenopausal Symptoms+") OR (MH "Perimenopause") |
| 9 | TI ( "peri-menopause" OR "peri-menopause" OR "perimenopause" OR “perimenopausal symptoms” OR “perimenopausal complaint*” OR "perimenopause*" OR "menopause" OR "climacteric" OR “menopause transition” OR “menopausal transition” OR "HRT" OR "hormonal replacement" OR "menopause hormone therapy" OR “menopause transition” OR “menopausal transition” ) OR AB ( "peri-menopause" OR "peri-menopause" OR "perimenopause" OR “perimenopausal symptoms” OR “perimenopausal complaint*” OR "perimenopause*" OR "menopause" OR "climacteric" OR “menopause transition” OR “menopausal transition” OR "HRT" OR "hormonal replacement" OR "menopause hormone therapy" OR “menopause transition” OR “menopausal transition” |
| 10 | (perimenopaus*) N20 wom#n) |
| 11 | (perimenopaus*) N20 symptoms |
| 12 | (hormone replacement therapy) N20 perimenopause |
| 13 | 8 OR 9 OR 10 OR 11 OR 12 |
| 14 | 7 AND 13 |
| 15 | (MH "Qualitative Studies+") |
| 16 | TI (( “qualitative research” OR “mixed methods” OR “mixed-methods” OR “questionnaire*” OR “focus group*” OR “focus group interview*” OR “focus group discussion*” OR “discourse analysis” OR “content analysis” OR “purposive sampling” OR “phenomenolog*” OR “ethnograph*” OR“grounded theory” OR “hermeneutics” OR “heuristic*” OR “narrative analysis” OR “thematic analysis” OR “themes” OR “thematic” OR “life world” OR “life-world” OR “live experience” or “case stud*” OR “case series” OR “case report*”)) |
| 17 | AB (“qualitative research” OR “mixed methods” OR “mixed-methods” OR “questionnaire*” OR “focus group*” OR “focus group interview*” OR “focus group discussion*” OR “discourse analysis” OR “content analysis” OR “purposive sampling” OR “phenomenolog*” OR “ethnograph*” OR“grounded theory” OR “hermeneutics” OR “heuristic*” OR “narrative analysis” OR “thematic analysis” OR “themes” OR “thematic” OR “life world” OR “life-world” OR “live experience” or “case stud*” OR “case series” OR “case report*”) |
| 18 | 15 OR 16 OR 17 |
| 19 | 14 AND 18 |

Footnotes:truncation symbol is an asterisk *, # hash sign wildcard alternate spelling

**Search Academic Search Complete**

| 1 | SU (general practitioner or gp or family doctor or primary care) |
| --- | --- |
| 2 | SU (hormone replacement therapy or hrt or estrogen replacement therapy or oestrogen) |
| 3 | SU (shared decision making or patient involvement or involvement) |
| 4 | TI (( "general Practice" OR "primary health care" OR "general practitioner*” OR "general physician” OR "family physicians" OR "family medicine" OR "family practice" OR "primary care physician*")) |
| 5 | AB (( "general Practice" OR "primary health care" OR "general practitioner*” OR "general physician” OR "family physicians" OR "family medicine" OR "family practice" OR "primary care physician*") |
| 6 | AB (("shared decision" OR "shared decisions" OR "shared medical decision" OR "shared medical decisions" OR "shared treatment*" OR "shared clinical decision" OR "shared clinical decisions" OR "informed decision" OR "informed choice" OR "decision making" OR "decision support" OR "decision behavior" OR "choice behavior" OR “choice behaviour” OR “decision behaviour” OR "patient participation" OR "patient involvement" OR "participatory decision*" OR "collaborative decision*")) |
| 7 | 1 OR 2 OR 3 OR 4 OR 5 OR 6 |
| 8 | SU (perimenopause or menopause) |
| 9 | TI ("peri-menopause" OR "peri-menopause" OR "perimenopause" OR “perimenopausal symptoms” OR “perimenopausal complaint*” OR "perimenopause*" OR "menopause" OR "climacteric" OR “menopause transition” OR “menopausal transition” OR "HRT" OR "hormonal replacement" OR "menopause hormone therapy" OR “menopause transition” OR “menopausal transition” )) |
| 10 | AB ("peri-menopause" OR "peri-menopause" OR "perimenopause" OR “perimenopausal symptoms” OR “perimenopausal complaint*” OR "perimenopause*" OR "menopause" OR "climacteric" OR “menopause transition” OR “menopausal transition” OR "HRT" OR "hormonal replacement" OR "menopause hormone therapy" OR “menopause transition” OR “menopausal transition” )) |
| 11 | AB (perimenopaus*) N20 wom#n) OR AB (perimenopaus*) N20 symptoms OR AB (hormone replacement therapy) N20 perimenopause |
| 12 | 8 OR 9 OR 10 OR 11 |
| 13 | 7 AND 12 |
| 14 | SU qualitative research |
| 15 | TI (“qualitative research” OR “mixed methods” OR “mixed-methods” OR “questionnaire*” OR “focus group*” OR “focus group interview*” OR “focus group discussion*” OR “discourse analysis” OR “content analysis” OR “purposive sampling” OR “phenomenolog*” OR “ethnograph*” OR“grounded theory” OR “hermeneutics” OR “heuristic*” OR “narrative analysis” OR “thematic analysis” OR “themes” OR “thematic” OR “life world” OR “life-world” OR “live experience” or “case stud*” OR “case series” OR “case report*) |
| 16 | AB (“qualitative research” OR “mixed methods” OR “mixed-methods” OR “questionnaire*” OR “focus group*” OR “focus group interview*” OR “focus group discussion*” OR “discourse analysis” OR “content analysis” OR “purposive sampling” OR “phenomenolog*” OR “ethnograph*” OR“grounded theory” OR “hermeneutics” OR “heuristic*” OR “narrative analysis” OR “thematic analysis” OR “themes” OR “thematic” OR “life world” OR “life-world” OR “live experience” or “case stud*” OR “case series” OR “case report*) |
| 17 | 14 OR 15 OR 16 |
| 18 | 13 AND 17 |

Footnotes: truncation symbol is an asterisk *

**Search Web of Science Core Collection**

| 1 | TS=("General Practice" OR "General Practitioners" OR "decision making, shared") |
| --- | --- |
| 2 | (AB=("General Practice" OR "primary health care" OR "general practitioner*" OR "general physician" OR "family physician*" OR "family medicine" OR "family practice" OR "primary care physician*")) OR ALL=("shared decision-making" OR "shared decision making" OR "shared decision" OR "shared decisions" OR "shared medical decision" OR "shared medical decisions" OR "shared treatment*" OR "shared clinical decision" OR "shared clinical decisions" OR "informed decision" OR "informed choice" OR "decision making" OR "decision support" OR "decision behavior" OR "choice behavior" OR "choice behaviour" OR "decision behaviour" OR "patient participation" OR "patient involvement" OR "participatory decision*" OR "collaborative decision*") |
|  | 1 OR 2 |
| 4 | TS=(Perimenopause OR Menopause OR Premenopause OR "Estrogen Replacement Therapy" OR "Hormone Replacement Therapy") |
| 5 | ALL=(peri-menopause OR peri-menopause OR perimenopause OR "perimenopausal symptoms" OR "perimenopausal complaint*" OR perimenopause* OR menopause OR climacteric OR "menopause transition" OR "menopausal transition" OR HRT OR "hormonal replacement" OR "menopause hormone therapy" OR "menopause trans |
| 6 | 4 OR 5 |
| 7 | 3 AND 6 |
| 8 | TS=("Qualitative Research") |
| 9 | ALL=("qualitative research" OR mixed-methods OR mixed-methods OR questionnaire* OR "focus group*" OR "focus group interview*" OR "focus group discussion*" OR "discourse analysis" OR "content analysis" OR "purposive sampling" OR phenomenolog* OR ethnograph* OR "grounded theory" OR hermeneutics OR heuristic* OR "narrative analysis" OR "thematic analysis" OR themes OR thematic OR life-world OR life-world OR "live experience" OR "case stud*" OR "case series" OR "case report*") |
| 10 | 8 OR 9 |
| 11 | 7 AND 10 |

Footnotes:truncation symbol is an asterisk *

**Search PsycINFO**

| 1 | TS=("General Practice" OR "General Practitioners" OR "decision making, shared") |
| --- | --- |
| 2 | (AB=("General Practice" OR "primary health care" OR "general practitioner*" OR "general physician" OR "family physician*" OR "family medicine" OR "family practice" OR "primary care physician*")) OR ALL=("shared decision-making" OR "shared decision making" OR "shared decision" OR "shared decisions" OR "shared medical decision" OR "shared medical decisions" OR "shared treatment*" OR "shared clinical decision" OR "shared clinical decisions" OR "informed decision" OR "informed choice" OR "decision making" OR "decision support" OR "decision behavior" OR "choice behavior" OR "choice behaviour" OR "decision behaviour" OR "patient participation" OR "patient involvement" OR "participatory decision*" OR "collaborative decision*") |
| 3 | 1 OR 2 |
| 4 | TS=(Perimenopause OR Menopause OR Premenopause OR "Estrogen Replacement Therapy" OR "Hormone Replacement Therapy") |
| 5 | ALL=(peri-menopause OR peri-menopause OR perimenopause OR "perimenopausal symptoms" OR "perimenopausal complaint*" OR perimenopause* OR menopause OR climacteric OR "menopause transition" OR "menopausal transition" OR HRT OR "hormonal replacement" OR "menopause hormone therapy" OR "menopause trans |
| 6 | 4 OR 5 |
| 7 | 3 AND 6 |
| 8 | TS=("Qualitative Research") |
| 9 | ALL=("qualitative research" OR mixed-methods OR mixed-methods OR questionnaire* OR "focus group*" OR "focus group interview*" OR "focus group discussion*" OR "discourse analysis" OR "content analysis" OR "purposive sampling" OR phenomenolog* OR ethnograph* OR "grounded theory" OR hermeneutics OR heuristic* OR "narrative analysis" OR "thematic analysis" OR themes OR thematic OR life-world OR life-world OR "live experience" OR "case stud*" OR "case series" OR "case report*") |
| 10 | 8 OR 9 |
| 11 | 7 AND 10 |

Footnotes:truncation symbol is an asterisk *

**Search Scopus**

| 1 | INDEX TERMS ( "general practice" OR "general practitioners" OR "shared decision making" ) |
| --- | --- |
| 2 | TITLE-ABS-KEY ( "general practice" OR "primary health care" OR "general practitioner*" OR "general physician" OR "family physician" OR "family medicine" OR "family practice" OR "shared decision making" OR "shared decision-making" OR "shared decision" ) |
| 3 | ALL ( "shared decisions" OR "shared medical decision" OR "shared medical decisions" OR "informed decision" OR "informed choice" OR "decision making" OR "decision support" OR "decision behaviour" OR "patient participation" OR "patient involvement" OR "collaborative decision" ) |
| 4 | 1 OR 2 OR 3 |
| 5 | INDEXTERMS ( perimenopause OR menopause OR estrogen AND replacement OR hormone AND replacement AND therapy ) |
| 6 | TITLE-ABS-KEY ( "peri-menopause" OR "peri-menopause" OR "perimenopause" OR "perimenopausal symptoms" OR "perimenopausal complaint*" OR "perimenopause*" OR "menopause" OR "climacteric" OR "menopause transition" OR "menopausal transition" OR "hrt" OR "hormonal replacement" OR "menopause hormone therapy" OR "menopause transition" OR "menopausal transition" ) |
| 7 | TITLE-ABS-KEY ( perimenopaus* W/20 symptoms OR perimenopaus* W/20 women ) |
| 8 | 5 OR 6 OR 7 |
| 9 | 4 AND 8 |
| 9 | INDEXTERMS ( qualitative ) |
| 10 | ( TITLE-ABS-KEY ( "qualitative research" OR "mixed-methods" OR "mixed methods" OR "questionnaire*" OR "focus group*" OR "focus group interview*" OR "focus group discussion*" OR "discourse analysis" OR "content analysis" OR "purposive sampling" OR "phenomenolog*" OR "ethnograph*" OR "grounded theory" OR "hermeneutics" OR "heuristic*" OR "narrative analysis" OR "thematic analysis" OR "themes" OR "thematic" OR "life-world" OR "life-world" OR "live experience" OR "case stud*" OR "case series" OR "case report" ) ) |
| 11 | 9 OR 10 |
| 12 | 9 AND 11 |

Footnotes:truncation symbol is an asterisk *

**Search Embase**

| 1 | 'general practice'/exp OR 'general practitioner'/exp OR 'shared decision making'/exp |
| --- | --- |
| 2 | 'general practice':ti,ab,kw OR 'primary health care':ti,ab,kw OR 'general practitioner*':ti,ab,kw OR 'general physician':ti,ab,kw OR 'family physician*':ti,ab,kw OR 'family medicine':ti,ab,kw OR 'family practice':ti,ab,kw OR 'primary care physician*':ti,ab,kw OR 'shared decision-making' OR 'shared decision making' OR 'shared decision' OR 'shared decisions' OR 'shared medical decision' OR 'shared medical decisions' OR 'shared treatment*' OR 'shared clinical decision' OR 'shared clinical decisions' OR 'informed decision' OR 'informed choice' OR 'decision making' OR 'decision support' OR 'decision behavior' OR 'choice behavior' OR 'choice behaviour' OR 'decision behaviour' OR 'patient participation' OR 'patient involvement' OR 'participatory decision*' OR 'collaborative decision*' |
| 3 | 1 OR 2 |
| 4 | 'climacterium'/exp OR 'menopause'/exp OR 'premenopause'/exp OR 'estrogen therapy'/exp OR 'hormone substitution'/exp |
| 5 | 'peri-menopause' OR 'perimenopause' OR 'perimenopausal symptoms' OR 'perimenopausal complaint*' OR 'perimenopause*' OR 'menopause' OR 'climacteric' OR 'hrt' OR 'hormonal replacement' OR 'menopause hormone therapy' OR 'menopause transition' OR 'menopausal |
| 6 | 'hormone replacement therapy decision':ti,ab,kw OR 'menopause hormone replacement therapy decision':ti,ab,kw OR 'symptoms perimenopause':ti,ab,kw OR 'perimenopausal symptoms':ti,ab,kw OR 'perimenopausal women':ti,ab,kw OR 'perimenopause women':ti,ab,kw |
| 7 | 4 OR 5 OR 6 |
| 8 | 7 AND 3 |
| 9 | 'qualitative research'/exp |
| 10 | 'qualitative research' OR 'mixed-methods' OR 'questionnaire*' OR 'focus group*' OR 'focus group interview*' OR 'focus group discussion*' OR 'discourse analysis' OR 'content analysis' OR 'purposive sampling' OR 'phenomenolog*' OR 'ethnograph*' OR 'grounded theory' OR 'hermeneutics' OR 'heuristic*' OR 'narrative analysis' OR 'thematic analysis' OR 'themes' OR 'thematic' OR 'life-world' OR 'live experience' OR 'case stud*' OR 'case series' OR 'case report*' |
| 11 | 9 0R 10 |
| 12 | 11 AND 8 |

Footnotes:truncation symbol is an asterisk *

**Supplementary File 4: Critical Appraisal of Included Studies (CASP)**

| CASP assessment questions* | 1 | 2 | 3 | 4 | 5 | 6 | 7 | 8 | 9 | 10 |
| --- | --- | --- | --- | --- | --- | --- | --- | --- | --- | --- |
| Article |  | | | | | | | | | |
| Cooper 20181 | Y | Y | Y | Y | Y | N | N | C | Y | Y |
| Herbert 20202 | Y | Y | Y | Y | Y | C | Y | Y | Y | Y |
| Stanzel 20223 | Y | Y | Y | Y | Y | C | Y | Y | Y | Y |
| Harper 20224 | Y | Y | Y | Y | Y | C | Y | Y | Y | Y |
| Burgin 20225 | Y | Y | Y | Y | Y | Y | Y | Y | Y | Y |
| Willman 20236 | Y | Y | Y | Y | Y | C | Y | Y | Y | Y |
| Richardson 20237 | Y | Y | Y | Y | Y | C | Y | Y | Y | Y |
| MacLellan 20238 | Y | Y | Y | Y | Y | Y | Y | Y | Y | Y |
| Ray 20239 | Y | Y | Y | Y | Y | C | Y | Y | Y | Y |
| Willman 202510 | Y | Y | Y | Y | Y | N | Y | Y | Y | Y |

*Y: yes, N: no, C: can’t tell. Assessment questions: 1) Was there a clear statement of the aims of the research? 2) Is a qualitative methodology appropriate? 3) Was the research design appropriate to address the aims of the research? 4) Was the recruitment strategy appropriate to the aims of the research?5) Were the data collected in a way that addressed the research issue?6) Has the relationship between researcher and participants been adequately considered? 7) Have ethical issues been taken into consideration?8) Was the data analysis sufficiently rigorous? 9) Is there a clear statement of findings? 10) How valuable is the research.

CASP Checklists - Critical Appraisal Skills Programme. CASP - Critical Appraisal Skills Programme, https://casp-uk.net/casp-tools-checklists

**Supplementary References**

1. Cooper J. Examining factors that influence a woman’s search for information about menopause using the socio-ecological model of health promotion. Maturitas. 2018;116:73-78. doi:10.1016/j.maturitas.2018.07.013

2. Herbert D, Bell RJ, Young K, Brown H, Coles JY, Davis SR. Australian women’s understanding of menopause and its consequences: a qualitative study. Climacteric. 2020;23(6):622-628. doi:10.1080/13697137.2020.1791072

3.Stanzel KA, Hammarberg K, Nguyen T, Fisher J. “They should come forward with the information”: menopause-related health literacy and health care experiences among Vietnamese-born women in Melbourne, Australia. *Ethnicity & Health*. 2022;27(3):601-616. doi:10.1080/13557858.2020.1740176

4. Harper JC, Phillips S, Biswakarma R, et al. An online survey of perimenopausal women to determine their attitudes and knowledge of the menopause. Womens Health (Lond). 2022;18:17455057221106890. doi:10.1177/17455057221106890

5. Burgin J, Bailey JV. Factors affecting contraceptive choice in women over 40: A qualitative study. *BMJ Open*. 2022;12(11). doi:10.1136/bmjopen-2022-064987

6. Willman A, King K. Serving through the perimenopause: Experiences of women in the UK Armed Forces. Maturitas. 2023;169:35-39. doi:10.1016/j.maturitas.2023.01.003

7. Richardson MK, Coslov N, Woods NF. Seeking Health Care for Perimenopausal Symptoms: Observations from The Women Living Better Survey. *J Womens Health*. 2023;32(4):434-444. doi:10.1089/jwh.2022.0230

8. MacLellan J, Dixon S, Bi S, Toye F, McNiven A. Perimenopause and/or menopause help-seeking among women from ethnic minorities: a qualitative study of primary care practitioners’ experiences. *Br J Gen Pract*. 2023;73(732):e511-e518. doi:10.3399/BJGP.2022.0569

9. Ray E, Maybin JA, Harper JC. Perimenopausal women’s voices: How does their period at the end of reproductive life affect wellbeing? *Post Reprod Health*. 2023;29(4):201-221. doi:10.1177/20533691231216162

10. Willman AS, King K. Treating the perimenopause in the UK Armed Forces: a mixed-methods review exploring the confidence of GPs. BJGP Open. 2025;9(1):BJGPO.2024.0088. doi:10.3399/BJGPO.2024.0088

**Supplementary File 5: The translation process**

| Cooper1 (2018) | Herbert2 (2020) | Stanzel3  (2022) | Harper4  (2022) | Burgin5  (2022) | MacLellan6 (2023) | Willman7  (2023) | Richardson8 (2023) | Ray9  (2023) | Willaman10 (2025) | Translation | Subtheme | Theme |
| --- | --- | --- | --- | --- | --- | --- | --- | --- | --- | --- | --- | --- |
| *“I felt like I was starting menopause early and my doctor just blatantly said that I wasn't experiencing menopause” (woman)* | Disappointed when symptoms are not recognised/  diagnosed.  Reasons for GP consultations ‘erratic periods’ and ‘hormone testing’.  wanting to know if symptoms of concern were menopause related*.* | Wanting to know whether the symptoms menopause were related. | Confusion with pre-existing conditions.  Symptoms not recognised by GP.  *no, you’re too young’*  *I had very little idea of the range of symptoms …. I knew about hot flushes and I didn’t have those so couldn’t work out what was happening to me…... I also really struggled to get any help from my GP. (woman)* | Symptoms not routinely discussed in contraception reviews.  Symptoms mis-diagnosed or ignored  Frustrated, disappointed that their healthcare provider had not helped them to identify peri-menopausal symptoms earlier.  *. But how do you know, if you’re taking the pill? How on earth do you know? (woman)* | Unpicking symptoms in the context of multiple health concerns and possibilities is difficult for women | - | *Wasn’t peri-menopause if I wasn’t having hot flashes (women)* | GPs do not “spot signs” of peri-menopause  *‘I was obviously having symptoms. And...my GP said, ‘you’re too young’ (woman)* | *'And I think the other the other point is that potentially perimenopausal patients can present with a cluster of symptoms ... And as a GP, that can feel a bit overwhelming when they say, "well, my mood is low, but I've also got, you know, dryness, I've also got skin issues.’ (GP)* | A need for clarity when there isn’t always any | Recognising symptoms and the quest for diagnostic certainty | Adrift in a sea of perimenopause uncertainty |
| A need for their HCPs to understand menopause better themselves so that they can help women normalise | *-* | Aa natural transition  Symptoms minimised or accepted as part of this phase of life | ‘Being told it is *‘a phase every women goes through’ (woman)*  Women bemused when they were given incorrect explanations by their GP | *-* | *Some of the women that I have spoken to….I think they found it to be a real revelation, t's not that something is wrong with them. That it’s a natural part of life’ (GP)* | *“stage of life” to be “tolerated” (woman)* | symptoms were typical of their age and perimenopause  *‘New PCP compassionate and went out of her way to normalize it’ (woman)* | - | - | When ‘normal’ collides. Reassurance or dismissal? | Mixed signals |
| Women want understand menopause better themselves so that they can help women normalize perimenopause  *‘Many doctors just can't answer questions and no one knows answers’ (woman)*  *‘My regular primary care physician has been wonderful but her expertise has been lacking in this area’ (woman)* | - | - | *‘If I had been more aware of what the symptoms were, and had had more of an understanding from my GP when I went with increasingly heavy/clotting periods at 40/41, then I feel I would have realised what was* happening’  women were ignored, not believed, or refused HRT, due to their GP’s lack of perimenopausal knowledge.  *‘I have the NICE guidelines to inform GP practice of this peri menopausal gaslighting and mis-prescribing’ (woman)*  disbelief and distress in the face of their GP’s limited education  hit and miss as to whether their GP would have sufficient knowledge  *Not all GPs are equipped to give support, information and appropriate medication* | *He’s like at some point, you know we’ll talk about maybe switching to progesterone only pill because you, um, “you’re at that age now”, or some kind of like throwaway statement that makes you go “What? What does that mean?* | - | Several HCPs told women that they did not have the knowledge or experience to manage peri-menopause  *‘It is difficult to communicate and understand your symptoms when so little is known about the menopause [by HCPs]’ (woman)* | - | *I think it should be compulsory for GPs to do all the training on the menopause. And if somebody wants to opt out of that, okay, well, you’re also opting out of treating women then. You don’t get to treat women if you haven’t studied this’ (woman)*  inadequate education leads healthcare professionals to lack the ability to recognise perimenopause and menstrual issues  Women believe in specialised training for GPs in women’s health and peri-menopause | - | Preparing to make my voice heard | Self-educating and advocacy in response to perceived gaps | Taking the helm: women’s advocacy and negotiated power in perimenopause constellations |
| *“The problems are probably that I didn't ask for much information. So I didn't get a lot."*  To participate in shared decision-making, both she and her HCP must be well-informed | *or going to your doctor and saying ’What are my options? Is there pills and then maybe looking to hormone replacement therapy and thing”* | *I will follow the recommendation and guidelines in Australia, the medical Western approach. I hope that I can, when the symptoms are more severe I will go the family doctor and ask her advice how to improve it*  Women want GPs to opportunistically initiate discussion of menopause and provide menopause-related health information when they consult them | *I have requested HRT for current and future health, but the GP has refused it. I have the NICE guidelines to inform GP practice of this peri menopausal gaslighting and mis-prescribing*  *Perimeno-pause should be routinely discussed at their health checks* | - | Women want accessible checklist of symptoms to bring to consultations to give them confidence to discuss their experiences | Alternative diagnoses such as depression and work related stress were proffered, and HRT prescribing was uncommon. Anti-depressants were frequently offered for psychological symptoms  Better baseline knowledge could improve opportunistic questioning , reduce  inappropriate prescribing of anti-depressant medications and increase HRT prescribing rates. | Satisfying health care interactions-shared decision making  *My PCP recommended anti-depressants. I recommended St. John’s Wort. She agreed with the St. John’s Wart, but said if that did not work, we should revisit the anti-depressants*  *In discussing symptoms we decided to address my anxiety with exercise, meditation and diet, and will revisit* | Women who seek care end up being wrongly prescribed anxiety or depression medications for their symptom | - | I want to be heard and involved | Seeking partnership: negotiating treatment options and women’s agency in consult-ations |
| - | Female doctors are sympathetic and have more under-standing  without a full-time female GP said that they would wait for the casual female GP to visit  would travel to see a female GP | *No, I will not trust a male doctor because I prefer a female doctor to check over my general health*  GP was a woman, as though hoping this would avail them satisfactory advice, yet they felt equally unsupported. Many felt the only option was to pay for private treatment | I *was lucky that a youngish woman doctor was on the ball*  No, I will not trust a male doctor because I prefer a female doctor to check over my general health  GP was a woman, as though hoping this would avail them satisfactory advice, yet they felt equally unsupported. | - | Women not felt listened to when speaking with a male clinician, even if he speaks Urdu  women who attended a GP with symptoms described feeling they were not listened to, and felt they had to attend multiple times, thus reducing their trust in the clinician and the health system  access to a female clinician could be challenging | - | - | - | Women may prefer seeing a female GP  female GPs might be less sympathetic  Male GPs, although less confident, might be more thorough for fear of missing something  Male GPs lacking in confidence would refer patients to another GP, usually female, who was more likely to have a women’s health interest  *‘Unless they have that interest in women’s health, they're not focusing on it. And so unless you have a particular interest ... it’s almost become easier for colleagues to just refer to another colleague, or say, or why don't you go and see that person, they have an interest in women’s health.’* | Gender shapes my care- GP agrees | - | Gendered dynamics: women’s experience and GP perceptions |
| - | Women from rural areas would wait to see a visiting female GP | *‘It is really difficult to find one that you can trust and talk to and to entrust the right thing for your health’* | *I have had to pay for help, which concerns me because I have asked my own GP several times*  *I don’t feel like a visit to the GP would help me, I would most likely get prescribed a generic HRT, no tests would be done and I’d be told ‘let’s see how you get on with this’. I’m planning to go privately to seek help for a more tailored approach rather than a trial and error method that NHS offers*  Many felt the only option was to pay for private treatment  Many felt the only option was to pay for private treatment |  | They (women) had to attend multiple times, thus reducing their trust in the clinician and the health system  *A good menopause consult cannot be done in 10 minutes. I mean you struggle to do it properly in 20 minutes, but you’re lucky if you get 20 minutes.’ (GP)* | Women in Defence should not have to seek private consultations to manage the peri-menopause | involved in care  Frustration with having to see more than one HCP  *‘Not great. I saw three different GPs’ (woman)* | - | limited case exposure (to perimenopause) and time demands meant confidence in managing peri-menopause was lacking  *‘I think the main one probably is the lack of patients. I think it really boils down to how many patients you're seeing. And if you're not seeing very many, you de-skill, and then it’s much more difficult to look after those patients’ (GP)* | The struggle to find and deliver the right care | - | Navigating structural obstacles and fragmented care |

**Supplementary References**

1. Cooper J. Examining factors that influence a woman’s search for information about menopause using the socio-ecological model of health promotion. Maturitas. 2018;116:73-78. doi:10.1016/j.maturitas.2018.07.013.

2. Herbert D, Bell RJ, Young K, Brown H, Coles JY, Davis SR. Australian women’s understanding of menopause and its consequences: a qualitative study. Climacteric. 2020;23(6):622-628. doi:10.1080/13697137.2020.1791072

3.Stanzel KA, Hammarberg K, Nguyen T, Fisher J. “They should come forward with the information”: menopause-related health literacy and health care experiences among Vietnamese-born women in Melbourne, Australia. *Ethnicity & Health*. 2022;27(3):601-616. doi:10.1080/13557858.2020.1740176

4. Harper JC, Phillips S, Biswakarma R, et al. An online survey of perimenopausal women to determine their attitudes and knowledge of the menopause. Womens Health (Lond). 2022;18:17455057221106890. doi:10.1177/17455057221106890

5. Burgin J, Bailey JV. Factors affecting contraceptive choice in women over 40: A qualitative study. *BMJ Open*. 2022;12(11). doi:10.1136/bmjopen-2022-064987

6. Willman A, King K. Serving through the perimenopause: Experiences of women in the UK Armed Forces. Maturitas. 2023;169:35-39. doi:10.1016/j.maturitas.2023.01.003

7. Richardson MK, Coslov N, Woods NF. Seeking Health Care for Perimenopausal Symptoms: Observations from The Women Living Better Survey. *J Womens Health*. 2023;32(4):434-444. doi:10.1089/jwh.2022.0230

8. MacLellan J, Dixon S, Bi S, Toye F, McNiven A. Perimenopause and/or menopause help-seeking among women from ethnic minorities: a qualitative study of primary care practitioners’ experiences. *Br J Gen Pract*. 2023;73(732):e511-e518. doi:10.3399/BJGP.2022.0569

9. Ray E, Maybin JA, Harper JC. Perimenopausal women’s voices: How does their period at the end of reproductive life affect wellbeing? *Post Reprod Health*. 2023;29(4):201-221. doi:10.1177/20533691231216162

10. Willman AS, King K. Treating the perimenopause in the UK Armed Forces: a mixed-methods review exploring the confidence of GPs. BJGP Open. 2025;9(1):BJGPO.2024.0088. doi:10.3399/BJGPO.2024.0088

**Supplementary File 6: Line of argument development**

| Navigating Uncertainty | Women and GPs share common challenges in recognising and interpreting perimenopausal symptoms. Diagnostic ambiguity and the quality of communication within consultations can contribute to uncertainty. Women seek clarity and validation of their experiences, while GPs work to support women in the face of uncertainty. |
| --- | --- |
| Taking the Helm | Women frequently engage in self-advocacy to navigate perceived gaps in care. They prepare for consultations, challenge treatment decisions, and seek private care when they perceive support is lacking. A key part of this advocacy is: many women perceive a clear distinction between 'right' and 'wrong' routes. HRT is often seen as the appropriate course, while antidepressants are viewed as dismissive or misinformed. This perceived mismatch leads some women to seek private healthcare, viewing it as more responsive and informed. |
| Gendered dynamics | GP gender influences women's trust and perceptions of care. Female GPs are often preferred, while male GPs report lower confidence and refer to female colleagues. Gendered assumptions shape expectations and experiences. |
| Structural obstacles | Systemic barriers such as short appointments, fragmented care, and limited access to GPs. |
